# Supplementary material
Source: MDPI journal article supplement (https://www.mdpi.com/1999-4907/14/3/508)
Supplement: s1 [file s1]

**Table S1.** The geographical location and sampling number of 7 populations of *M. crassipes*

| Location                                     | Population ID | Latitude (N) | Longitude (E) | Altitude (m) | Sample size | Habitats and associated trees                                                                                                                                         |
|----------------------------------------------|---------------|--------------|---------------|--------------|-------------|-----------------------------------------------------------------------------------------------------------------------------------------------------------------------|
| Julianshan, Longnan County, Jiangxi Province | P1            | 24°34'       | 114°26'       | 388          | 14          | Shady slope, under the forest; <i>Schima superba</i> Gardn. et Champ., <i>Pinus massoniana</i> Lamb., <i>Photinia prunifolia</i> (Hook. et Arn.) Lindl.               |
| Nanling, Ruyuan County, Guangdong Province   | P2            | 24°55'       | 113°5'        | 828          | 14          | Steep hillside; <i>Cunninghamia lanceolata</i> (Lamb.) Hook., <i>Castanopsis eyrei</i> (Champ.) Tutch.                                                                |
| Huaping, Guilin City, Guangxi Province       | P3            | 25°37'       | 109°09'       | 630          | 25          | Under the Bamboo Forest; <i>Schima superba</i> Gardn. et Champ., <i>Cunninghamia lanceolata</i> (Lamb.) Hook., <i>Phyllostachys heterocycla</i> (Carr.) Mitford       |
| Ganchong, Xinning County, Hunan Province     | P4            | 26°30'       | 111°          | 425          | 24          | Gullies, roadsides; <i>Schima superba</i> Gardn. et Champ., <i>Camellia caudata</i> Wall., <i>Elaeocarpus chinensis</i> (Gardn. et Champ.) Hook. f. ex Benth.         |
| Hengshan, Hunan Province                     | P5            | 27°13'       | 112°12'       | 599          | 19          | Mountain secondary forest; <i>Cyclobalanopsis glauca</i> (Thunb.) Oerst., <i>Ternstroemia gymnanthera</i> (Wight et Arn.) Beddome, <i>Litsea cubeba</i> (Lour.) Pers. |
| Jinggangshan, Jiangxi Province               | P6            | 26°32'       | 114°14'       | 530          | 24          | Gully-side secondary forest; <i>Phoebe bournei</i> (Hemsl.) Yang, <i>Cunninghamia lanceolata</i> (Lamb.) Hook.                                                        |
| Guanshan, Yifeng County, Jiangxi Province    | P7            | 28°37'       | 114°14'       | 407          | 8           | Secondary forests along valleys and streams; <i>Cunninghamia lanceolata</i> (Lamb.) Hook., <i>Styrax tonkinensis</i> (Pierre) Craib ex Hartw.                         |
